# Supplementary material for: Identification of LMAN1- and SURF4-Dependent Secretory Cargoes
Source: PubMed Central journal article supplement — J Proteome Res. 2023 Oct 16;22(11):3439–46. doi: 10.1021/acs.jproteome.3c00259 (PMC10629478; doi:10.1021/acs.jproteome.3c00259), 2023-10-16
Supplement: pr3c00259_si_001.pdf [file pr3c00259_si_001.pdf]

## Identification of LMAN1 and SURF4 dependent secretory cargoes

Vi T. Tang<sup>1,2</sup>, Prabhodh S. Abbineni<sup>2,3</sup>, Felipe da Veiga Leprevost<sup>4</sup>, Venkatesha Basrur<sup>4</sup>,  
Rami Khoriaty<sup>5,6</sup>, Brian T. Emmer<sup>5</sup>, Alexey I. Nesvizhskii<sup>4,7</sup>, and David Ginsburg<sup>2,5,8,9,10,\*</sup>

<sup>1</sup>Department of Molecular and Integrative Physiology, University of Michigan, Ann Arbor, MI 48109, USA

<sup>2</sup>Life Sciences Institute, University of Michigan, Ann Arbor, MI 48109, USA

<sup>3</sup>Department of Microbiology and Immunology, Loyola University Chicago Stritch School of Medicine, Maywood, IL 60153, USA

<sup>4</sup>Department of Pathology, University of Michigan, Ann Arbor, MI 48109, USA

<sup>5</sup>Department of Internal Medicine, University of Michigan, Ann Arbor, MI 48109, USA

<sup>6</sup>Department of Cell and Developmental Biology, University of Michigan, Ann Arbor, MI 48109, USA

<sup>7</sup>Department of Computational Medicine and Bioinformatics, University of Michigan, Ann Arbor, MI 48109, USA

<sup>8</sup>Department of Human Genetics, University of Michigan, Ann Arbor, MI 48109, USA

<sup>9</sup>Department of Pediatrics and Communicable Diseases, University of Michigan, Ann Arbor, MI 48109, USA

<sup>10</sup>Howard Hughes Medical Institute, University of Michigan, Ann Arbor, MI 48109, USA

\*To whom correspondence should be addressed

Room 5028

Life Sciences Institute

210 Washtenaw Avenue

Ann Arbor, MI 48109-2216

734-647-4808

[ginsburg@umich.edu](mailto:ginsburg@umich.edu)

## Table of Contents

- Figure S1** Comparison of protein abundance in the cell media and lysates improves identification of secreted proteins
- Figure S2** Comparison of proteins abundance in the lysates and media between LMAN1 deficient and control cells
- Figure S3** Efficient depletion of LMAN1 in cells treated with *LMAN1* targeting gRNA
- Figure S4** Comparison of proteins abundance in the lysates and media between SURF4 deficient and control cells
- Figure S5** Gene Ontology (GO) enrichment analysis for biological process terms
- Figure S6** Proteins that are not SURF4 cargoes on average carry better ER-ESCAPE motif than putative SURF4 cargoes

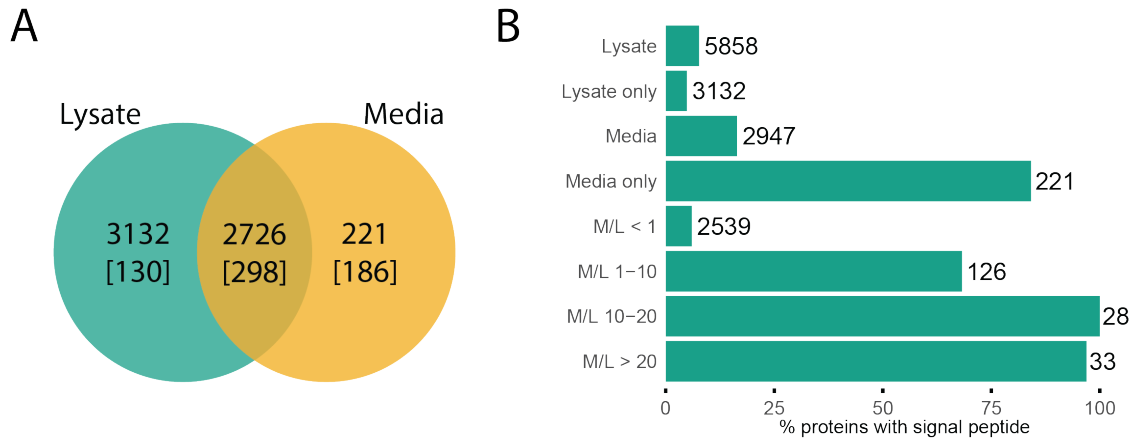

**Figure S1: Comparison of protein abundance in the cell media and lysates improves identification of secreted proteins.** **(A)** Venn diagram of proteins detected in conditioned media, cell lysates, or both fractions across all samples (LMAN1-deficient, SURF4-deficient, and NT-treated cells, n = 3 per group). Numbers in the bracket represent the number of proteins carrying an annotated signal peptide in each group. **(B)** Proteins were separated into discrete media/lysate (M/L) ratio intervals and the percentage of proteins carrying a signal peptide was calculated. Numbers at the end of each bar indicate the number of proteins in each bin.

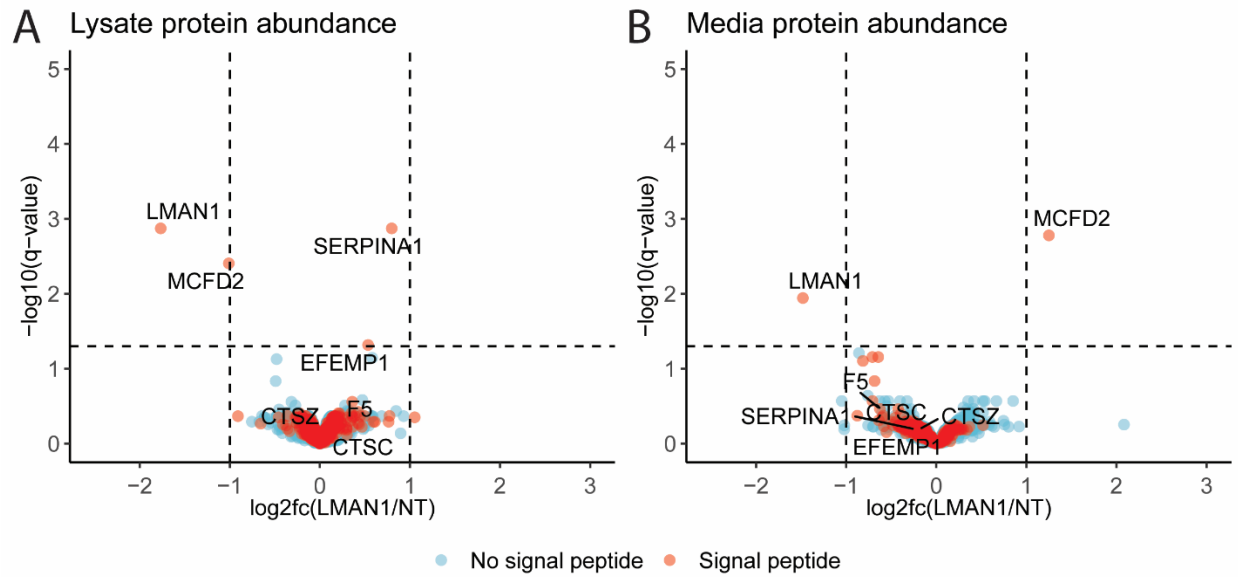

**Figure S2: Comparison of proteins abundance in the lysates and media between LMAN1 deficient and control cells.** Volcano plots representing changes in protein abundance in the cell lysates **(A)** or conditioned media **(B)**. The  $\log_2$  fold change ( $\log_2\text{fc}$ ) and statistical significance are plotted on the x and y-axis, respectively. Proteins with a signal peptide are colored in red and proteins without a signal peptide are colored in blue. Dashed vertical lines represent the  $\log_2\text{fc}$  of 1 and -1. Dashed horizontal lines represent the  $-\log_{10}(q\text{-value})$  of 0.05.

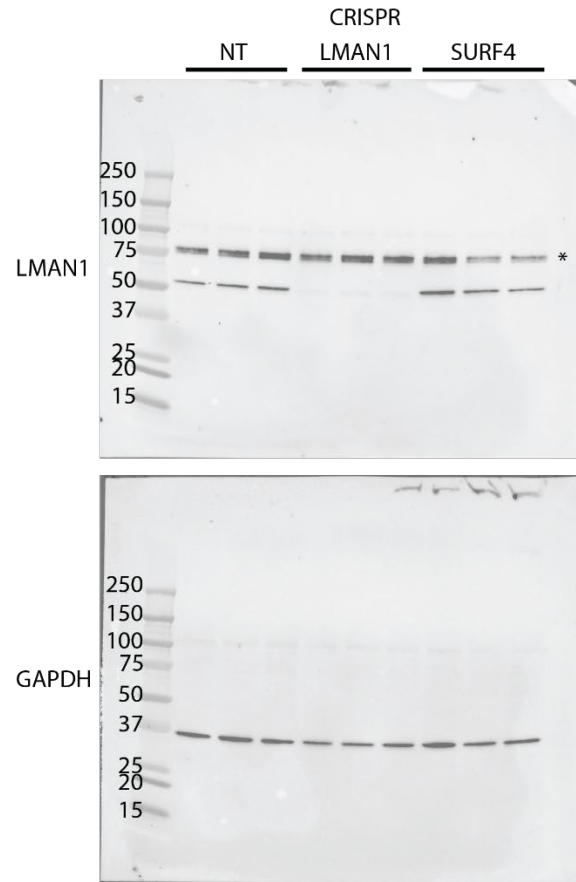

**Figure S3: Efficient depletion of LMAN1 in cells treated with *LMAN1* targeting gRNA.**

Immunoblots of cell lysates collected from controls (NT) and *LMAN1* or *SURF4* deleted cells.

Numbers represent protein molecular weights in kDa. Asterisk indicates nonspecific binding of LMAN1 antibody.

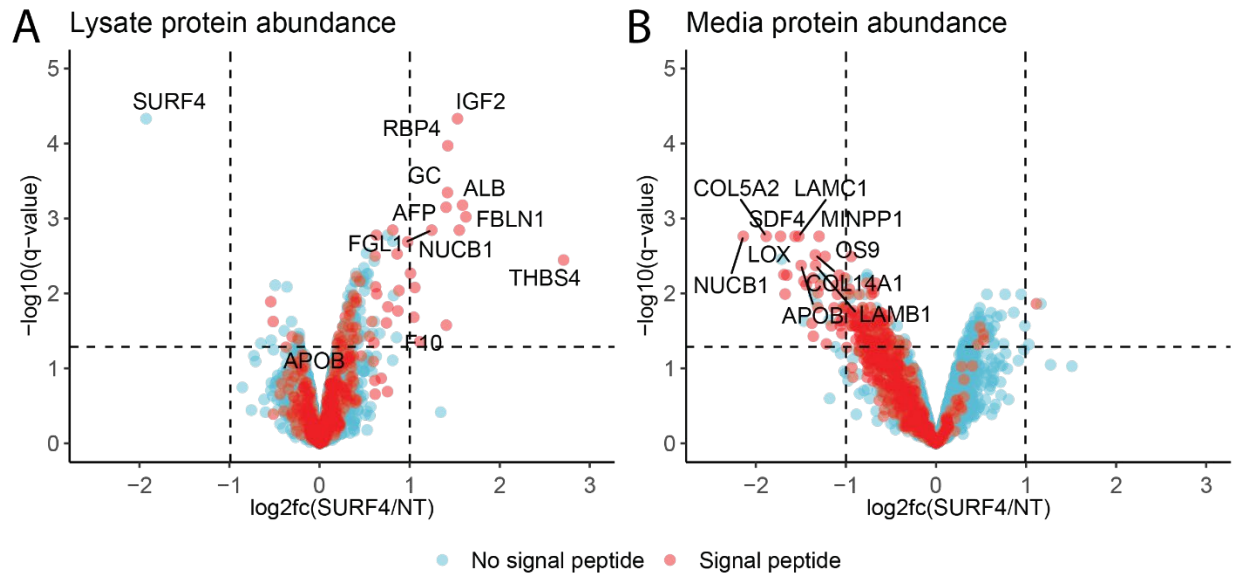

**Figure S4: Comparison of proteins abundance in the lysates and media between SURF4 deficient and control cells.** Volcano plots representing changes in protein abundance in the cell lysates **(A)** or conditioned media **(B)**. The log<sub>2</sub> fold change (log<sub>2</sub>fc) and statistical significance are plotted on the x and y-axis, respectively. Proteins with a signal peptide are colored in red and proteins without a signal peptide are colored in blue. Dashed vertical lines represent the log<sub>2</sub>fc of 1 and -1. Dashed horizontal lines represent the -log<sub>10</sub>(q-value of 0.05).

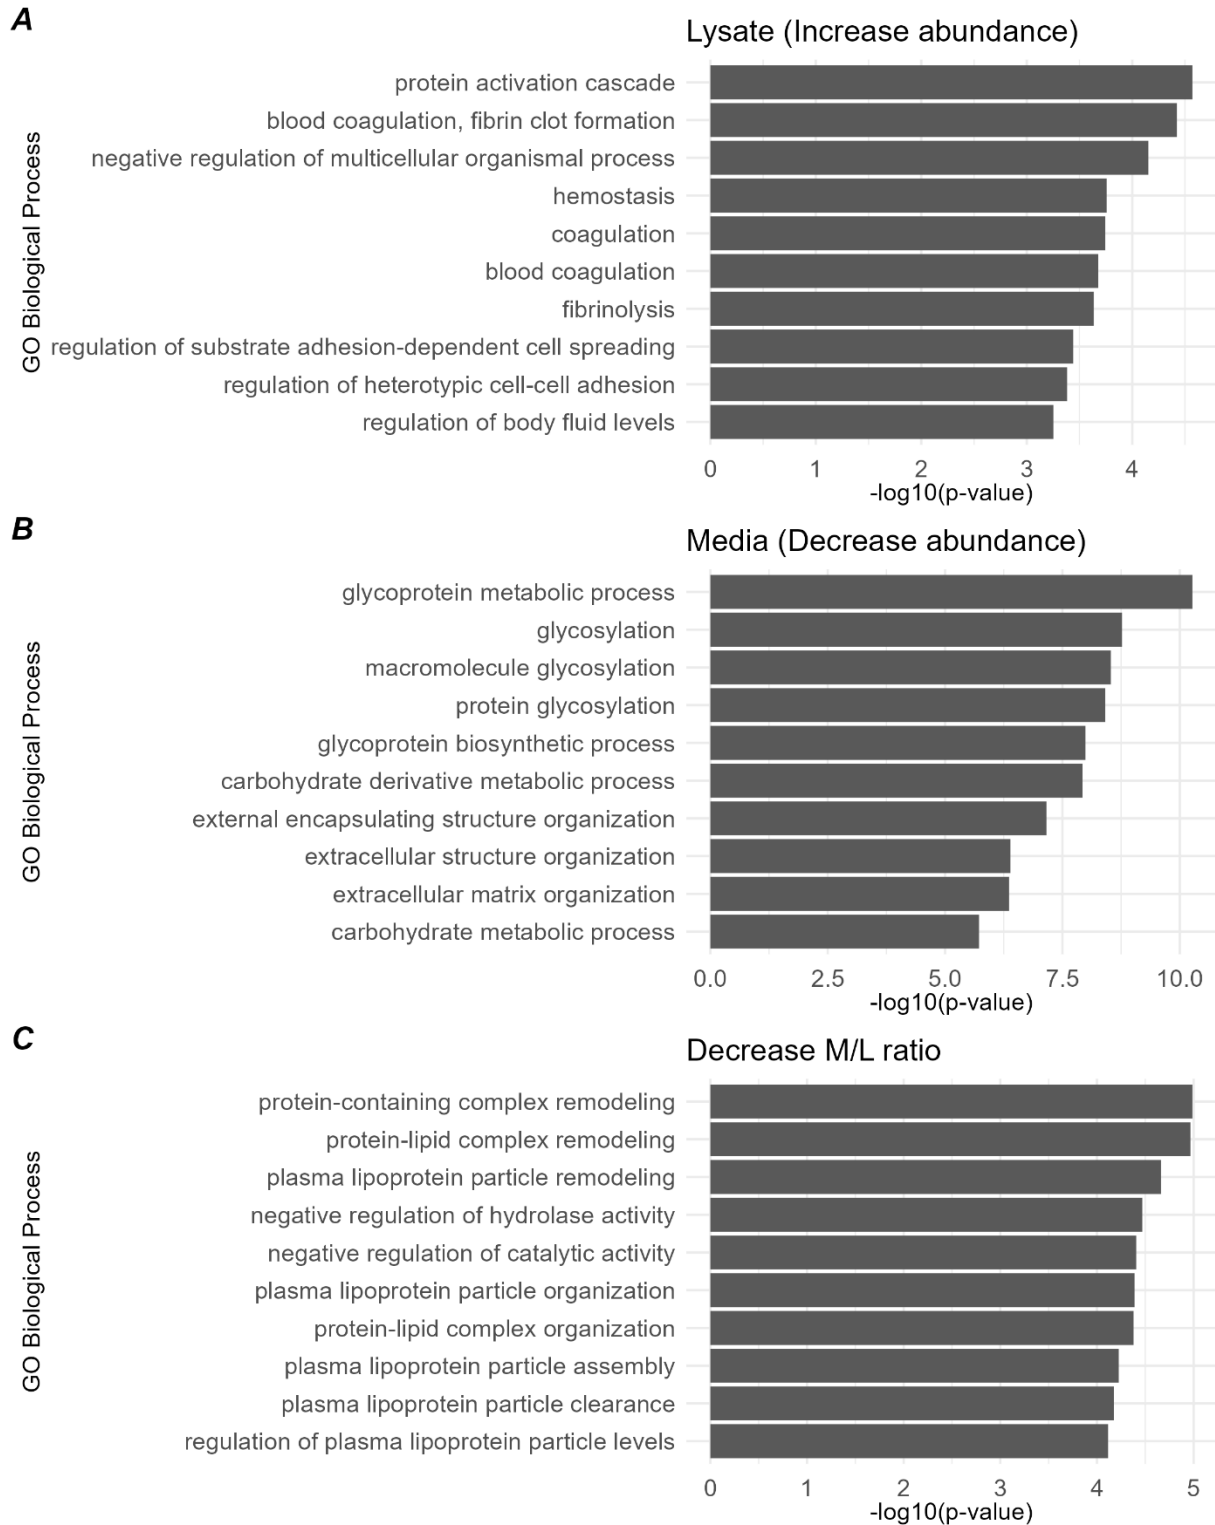

**Figure S5: Gene Ontology (GO) enrichment analysis for biological process terms using a list of proteins that demonstrated increase lysate abundance (A), decrease media abundance (B), and decrease M/L ratio (C)**

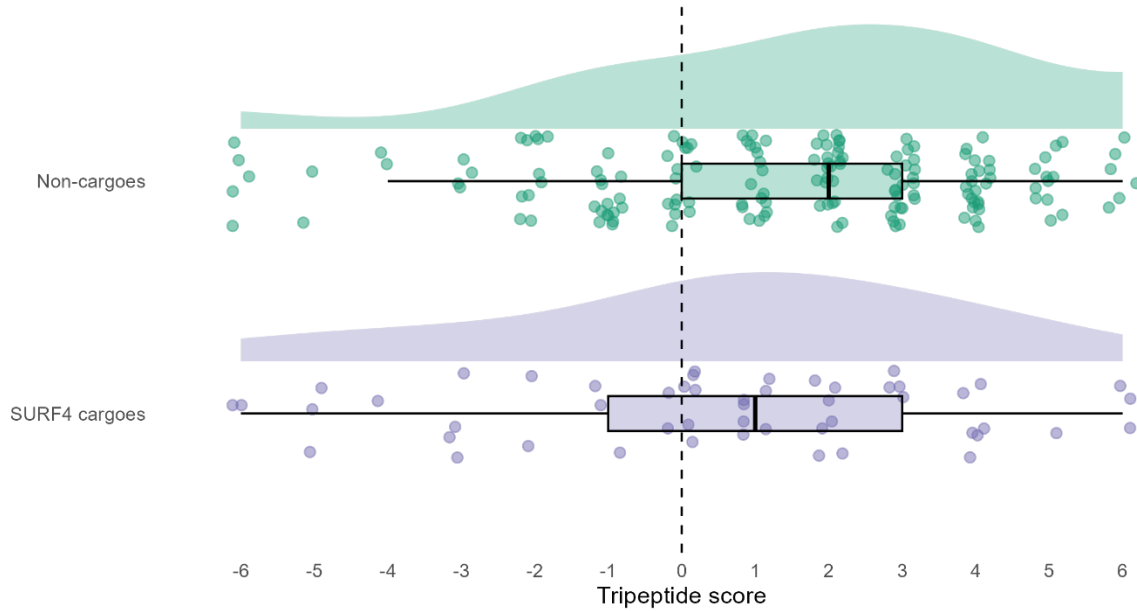

**Figure S6: Proteins that are not SURF4 cargoes on average carry better ER-ESCAPE**

**motif than putative SURF4 cargoes.** To determine whether ER-ESCAPE motifs (as defined by Yin et al. <sup>29</sup>) are enriched in putative SURF4 cargoes, we assigned a score for each amino acid residue in the tripeptide motif (-2 for “bad” residue, -1 for “not good” residue, 0 for “neutral” residue, 1 for “good” residue, and 2 for “very good” residue, see **Figure 3**) and calculate a tripeptide score for each protein by summing up the score for each individual residue. The tripeptide scores range from -6 (a tripeptide with 3 “bad” residues) to 6 (a tripeptide with 3 “very good” residues).
